# Supplementary material
Source: PubMed Central journal article supplement (PMC1899463)

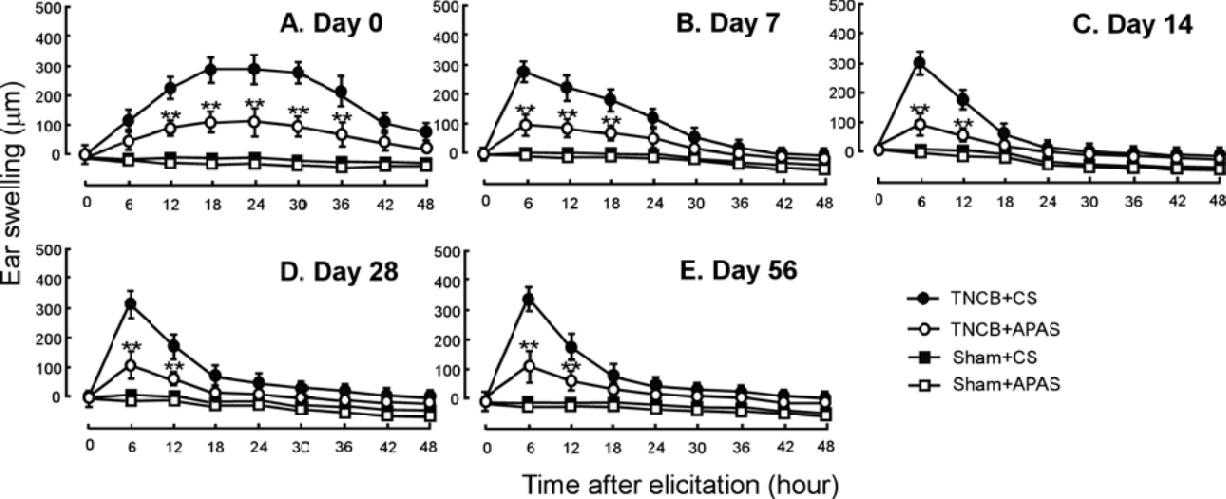

Supplementary Figure S1.

Supplement: amjpathol_170_6_2019__1.pdf [file amjpathol_170_6_2019__1.pdf]

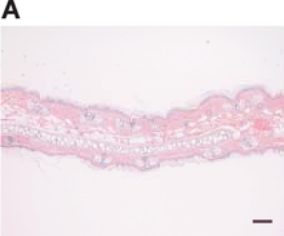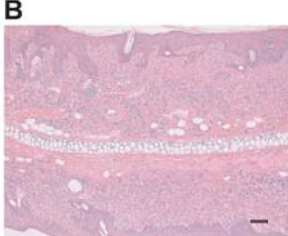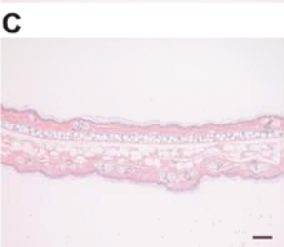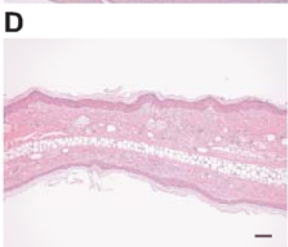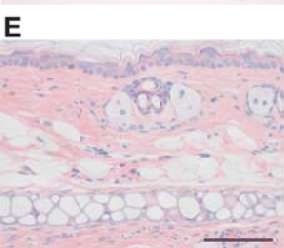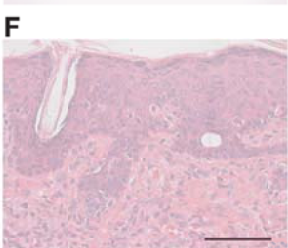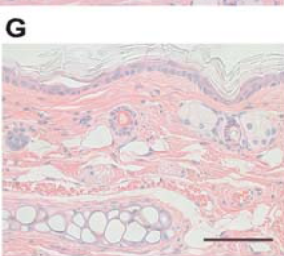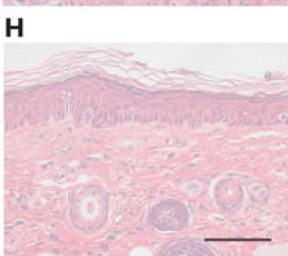

**Supplementary Figure S2.**

Supplement: amjpathol_170_6_2019__2.pdf [file amjpathol_170_6_2019__2.pdf]
